# Supplementary material for: Opto‐Electrochemical Dissolution Reveals Coccolith Calcium Carbonate Content
Source: PubMed Central journal article supplement (PMC8518593; doi:10.1002/anie.202108435), 2021-08-15
Supplement: ANIE-60-20999-s001.pdf [file ANIE-60-20999-s001.pdf]

## Supporting Information

### **Opto-Electrochemical Dissolution Reveals Coccolith Calcium Carbonate Content**

*Minjun Yang, Christopher Batchelor-McAuley, Samuel Barton, Rosalind E. M. Rickaby, Heather A. Bouman, and Richard G. Compton\**

anie\_202108435\_sm\_miscellaneous\_information.pdf

## SUPPORTING INFORMATION

## Table of Contents

|           |                                                                                                                     |    |
|-----------|---------------------------------------------------------------------------------------------------------------------|----|
| Section 1 | Chemicals .....                                                                                                     | 3  |
| 1.1       | Electrochemistry .....                                                                                              | 3  |
| 1.2       | Cell culturing media .....                                                                                          | 3  |
| Section 2 | Imaging.....                                                                                                        | 5  |
| 2.1       | Scanning electron microscopy .....                                                                                  | 5  |
| 2.2       | Optical microscopy.....                                                                                             | 5  |
| 2.3       | Combined opto-electrochemistry .....                                                                                | 5  |
| 2.4       | Image analysis .....                                                                                                | 6  |
| Section 3 | Redox chemistry of the acid precursor 1,4-dihydroxybenzene .....                                                    | 9  |
| Section 4 | Experimental calcite dissolution rate versus distance from the electrode.....                                       | 11 |
| Section 5 | Mass-transport of electrochemically generated reagents: numerical simulation.....                                   | 12 |
| Section 6 | Calcite particle dissolution kinetics.....                                                                          | 15 |
| 6.1       | Surface reaction kinetics .....                                                                                     | 15 |
| 6.2       | Mass-transport and the effect of particle size .....                                                                | 16 |
| 6.3       | Experimental verification of the dissolution kinetics.....                                                          | 19 |
| 6.4       | Numerically predicted dissolution kinetics of a calcite particle as a function of distance from the electrode ..... | 20 |
| Section 7 | Coccolith data.....                                                                                                 | 22 |

## SUPPORTING INFORMATION

## Section 1 Chemicals

## 1.1 Electrochemistry

Potassium nitrate was purchased from Scientific Laboratory Supplies Limited, U.K. 1,4-dihydroxybenzene was purchased from Sigma-Aldridge, U.K. Detrital calcium carbonate powder was purchased from Alfa Aesar, U.S. The shape of the received calcium carbonate crystallinity in the  $\text{CaCO}_3$  powder is rhombohedral under light microscope, which is a strong indication of calcite crystalline. The powder was ground in a pestle and mortar for 10 minutes to obtain the quasi-spherical-shaped calcite shown in Section 2.2. All chemicals were used without further purification. Aqueous solutions were made using ultrapure water (Millipore, resistivity 18.2  $\text{M}\Omega\text{ cm}$  at 25 °C). All of the  $\text{H}_2\text{BQ}$  solutions were freshly prepared on the day of the experiments.

## 1.2 Cell culturing media

The cultures used in this study were obtained from Roscoff Culture Collection (RCC, France): *E.huxleyi* (RCC1216), *G.oceanica* (RCC1314), *C.leptoporus* (RCC1130) and *C.braarudii* (RCC1198). All cultures were maintained by regular batch culturing on a K/2 enriched growth medium modified from the recipe for K medium by Keller *et al.* with f/2 vitamins and silica component omitted.<sup>1</sup> Aquil synthetic ocean water was used instead of natural seawater.<sup>2</sup> The final molarity of each of the medium components in the K/2 recipe are summarized in Tables S1. To maintain the cultures, regular batch culture inoculations were made into Tissue Culture Treated Flasks (culture area 25  $\text{cm}^2$ , Corning™ Falcon™, USA), under sterile conditions, to a total culture volume of 40ml. All cultures were kept in a PHCbi MLR-352-PE Incubator (PHC Eurpe B.V.), on a 14:10 light – dark cycle with a PAR intensity of 40-60  $\mu\text{mol m}^{-2} \text{s}^{-1}$ . For the electrochemical dissolution experiments, coccolith samples in their respective late stationary phase were studied. This resulted in proportionally more detached coccoliths to complete coccospheres in the culture medium.

Table S1 : A summary of the molar concentration of all the components in the synthetic ocean water based K/2 growth medium.

|                                                                           |                                           | Molar Concentration in final K/2 growth medium ( $\text{mol dm}^{-3}$ ) |
|---------------------------------------------------------------------------|-------------------------------------------|-------------------------------------------------------------------------|
| Synthetic Ocean Water (SOW) based on the Aquil medium recipe <sup>2</sup> | NaCl                                      | $4.20 \times 10^{-1}$                                                   |
|                                                                           | $\text{Na}_2\text{SO}_4$                  | $2.88 \times 10^{-2}$                                                   |
|                                                                           | KCl                                       | $9.39 \times 10^{-3}$                                                   |
|                                                                           | $\text{NaHCO}_3$                          | $2.38 \times 10^{-3}$                                                   |
|                                                                           | KBr                                       | $8.40 \times 10^{-4}$                                                   |
|                                                                           | $\text{H}_3\text{BO}_3$                   | $4.85 \times 10^{-5}$                                                   |
|                                                                           | NaF                                       | $7.15 \times 10^{-5}$                                                   |
|                                                                           | $\text{MgCl}_2 \cdot 6\text{H}_2\text{O}$ | $5.46 \times 10^{-2}$                                                   |
|                                                                           | $\text{CaCl}_2 \cdot 2\text{H}_2\text{O}$ | $1.05 \times 10^{-2}$                                                   |
|                                                                           | $\text{SrCl}_2 \cdot 6\text{H}_2\text{O}$ | $6.38 \times 10^{-5}$                                                   |
| K/2 medium enrichment based on the K recipe, <sup>1</sup>                 | $\text{NaNO}_3$                           | $4.41 \times 10^{-4}$                                                   |
|                                                                           | $\text{NH}_4\text{Cl}$                    | $2.50 \times 10^{-5}$                                                   |

## SUPPORTING INFORMATION

---

|                                     |                                                     |                          |
|-------------------------------------|-----------------------------------------------------|--------------------------|
| with silica component<br>omitted    | Na <sub>2</sub> b-glycerophosphate                  | 5.00 x 10 <sup>-6</sup>  |
|                                     | H <sub>2</sub> SeO <sub>3</sub>                     | 5.00 x 10 <sup>-9</sup>  |
|                                     | Na <sub>2</sub> EDTA.2H <sub>2</sub> O              | 5.55 x 10 <sup>-5</sup>  |
|                                     | FeCl <sub>3</sub> .6H <sub>2</sub> O                | 5.85 x 10 <sup>-6</sup>  |
|                                     | MnCl <sub>2</sub> .4H <sub>2</sub> O                | 4.50 x 10 <sup>-7</sup>  |
|                                     | ZnSO <sub>4</sub> .7H <sub>2</sub> O                | 4.00 x 10 <sup>-8</sup>  |
|                                     | CoCl <sub>2</sub> .6H <sub>2</sub> O                | 2.10 x 10 <sup>-8</sup>  |
|                                     | Na <sub>2</sub> MoO <sub>4</sub> .2H <sub>2</sub> O | 1.30 x 10 <sup>-8</sup>  |
|                                     | CuSO <sub>4</sub> .5H <sub>2</sub> O                | 5.00 x 10 <sup>-9</sup>  |
| F/2 vitamin enrichment <sup>2</sup> | Thiamine. HCl (Vitamin B1)                          | 2.96 x 10 <sup>-7</sup>  |
|                                     | Biotin (Vitamin H)                                  | 2.05 x 10 <sup>-9</sup>  |
|                                     | Cyanocobalamin (Vitamin B12)                        | 3.69 x 10 <sup>-10</sup> |

---

## SUPPORTING INFORMATION

## Section 2 Imaging

## 2.1 Scanning electron microscopy

The phytoplankton culture containing the coccoliths were filtered using a poly-carbonate filter (0.01  $\mu\text{m}$ ), washed with deionized water, and subsequently dried at atmospheric pressure. Prior to the imaging, 10 nm of gold thin-layer was coated over the sample using a rotary pumped coater (Q150RES, Quorum, UK). The Scanning Electron Microscopy (SEM) images were obtained using a Sigma 300 FEG-SEM from Zeiss with an accelerating voltage of 2.0 kV.

Figure S1 presents a representative image of the *C.leptoporus* coccoliths, as highlighted in the main body a number of the coccoliths were found to be deformed.

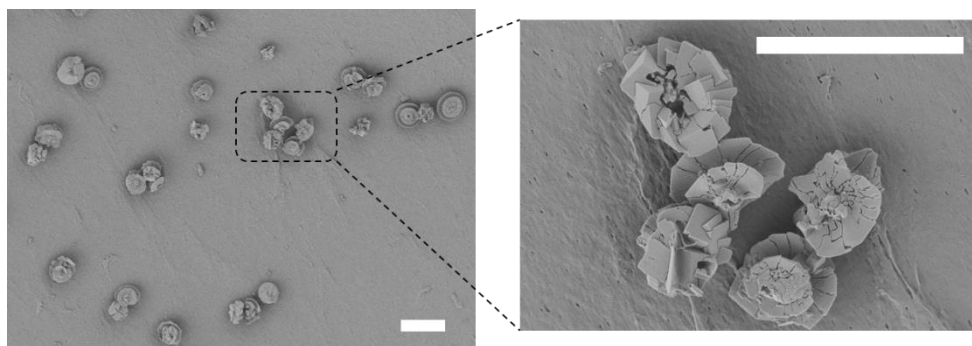

Figure S1: SEM images of coccoliths detached from *C.leptoporus*. Note the presence of some deformed coccoliths. Scale bar = 10  $\mu\text{m}$ .

## 2.2 Optical microscopy

Optical measurements were made on a Zeiss Axio Examiner, A1 Epifluorescence microscope (Carl Zeiss Ltd., Cambridge U.K.), using a 40x oil immersion objective (Plan-Apochromat 40x/1.3 Iris (UV)VIS-IR). The objective lens aperture was set to 0.7 to optimize for darkfield contrast. The darkfield illumination of coccoliths was achieved by using an oil-immersion darkfield condenser (NA = 1.2/1.4, Carl Zeiss Ltd., Cambridge U.K.). The video acquisition was provided by a Hamamatsu ORCA-Flash 4.0 digital CMOS camera (Hamamatsu, Japan), providing 16-bit images with 4-megapixel resolution.

## 2.3 Combined opto-electrochemistry

The opto-electrochemical cell is built on top of a glass slide to allow the acid dissolution of individual coccoliths to be imaged during the experiment. Figure S2 shows a schematic of the thin-layer cell used. The cell consists of two carbon fibre electrodes (diameter 7 $\mu\text{m}$ , Goodfellow Cambridge Ltd.) which act as working and counter electrodes. A third electrode, a silver wire (diameter 50 $\mu\text{m}$ , Goodfellow Cambridge Ltd.) is used as the pseudo-reference electrode. The cell depth is roughly 100  $\mu\text{m}$ . Potentiostatic control and synchronization with the camera were provided by an previously developed in-house built device<sup>3</sup> and current-amplifier (Keithley 427) from Keithley Instruments Inc, US. All opto-electrochemical experiments were all conducted at room temperature.

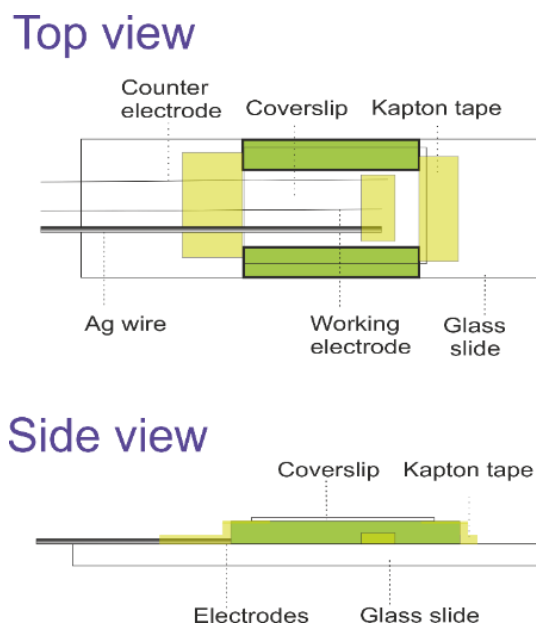

Figure S2: Schematic of the bespoke opto-electrochemical cell. The cell has three electrodes: a working, counter and reference electrode. The working and counter electrode are carbon fibre wires ( $r_e=3.5\mu\text{m}$ ), whereas the reference is an Ag wire electrode ( $r_e = 25\mu\text{m}$ ). The cell depth is approximately  $100\mu\text{m}$ .

## 2.4 Image analysis

During the course of the opto-electrochemical experiment the cell was optically imaged at 10 fps. The resulting series of images were analyzed using (Fiji) ImageJ freeware.<sup>4</sup> Macro scripting in ImageJ allows the coccoliths to be identified and the distance from the working electrode to be measured, reported as electrode edge to coccolith centre. The stack of images containing individual coccoliths were cropped and duplicated to allow auto-threshold ('Huang2') over the stack histogram to be performed for each of the individual coccoliths. 'Huang2' is a built-in implementation allowing systematic image thresholding without input from the user. The projection area of a coccolith is found by counting the total number of white pixels in the binary 2-D image multiplied by the pixel resolution ( $0.155\times 0.155\ \mu\text{m}^2\ \text{pixel}^{-1}$ ). To estimate the volume of a coccolith, the number of white pixels in the z-stack of binary images as obtained during the coccolith dissolution is summed across each of the image coordinates in the x-y directions – illustrated in Figure S3. The number of white pixels in the z-stack, at each x-y image coordinate, is then multiplied by the initial dissolution rate (obtained experimentally,  $\mu\text{m}\ \text{s}^{-1}$ ) and the time between each image to reveal the reconstructed coccolith as shown in Figure S3 (shaded green). Assuming the coccolith is entirely made of calcite, the mass of each coccolith is estimated by multiplying the estimated volume by the density of calcite ( $2.71\ \text{g}\ \text{cm}^{-3}$  at  $25^\circ\text{C}$ )<sup>5</sup>.

Notice that the image reconstructed *C.braaudii* coccolith in Figure S3 resembles the shape of that obtained in SEM images. The finer structural detail of the coccolith is not comparable to imaging using electron microscopy due to the limitation of optical resolution and the nature of reconstruction from a stack of projection images. But in terms of the estimation of coccolith mass, as shown in the main manuscript, this method reconstructs

## SUPPORTING INFORMATION

coccoliths with mass values spanning over 2 orders of magnitude, successfully showing both intraspecies and interspecies variation. Table S2 shows four optical and reconstructed images of *C.braaudii* coccolith before and after dissolution in different electrolyte media.

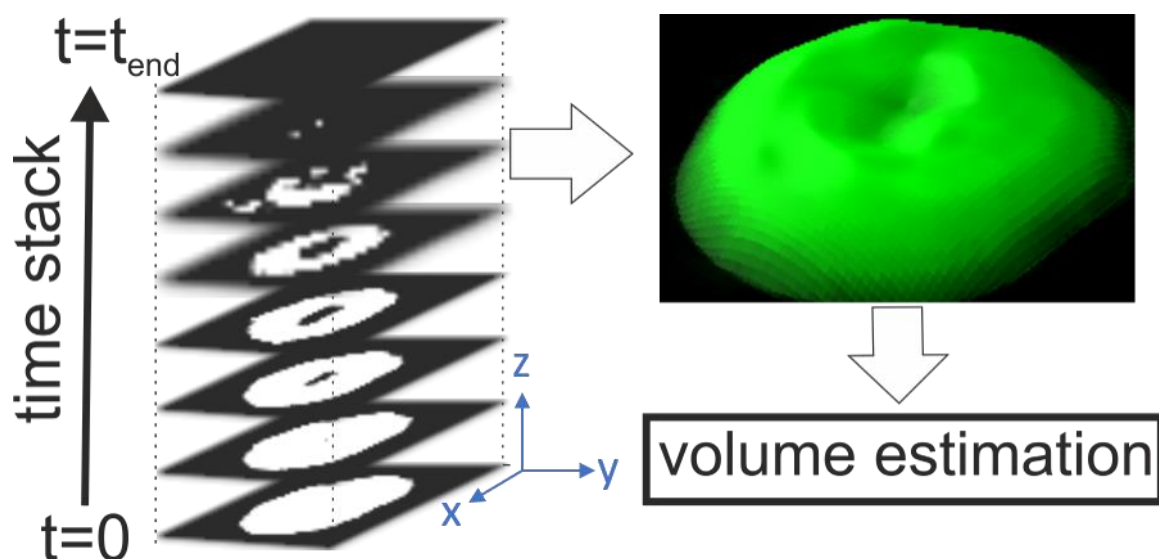

Figure S3: A schematic showing the image reconstruction process in estimating the volume of the coccolith prior to dissolution. All image analysis were performed in Fiji ImageJ freeware.

## SUPPORTING INFORMATION

Table S2. Optical and reconstructed images of *C.braudii* coccoliths from different electrolytes, obtained prior to and after acid dissolution, respectively.

| Electrolyte                     | Distance from electrode ( $\mu\text{m}$ ) | Raw image (t=0)                                                                     | Reconstructed image after acid dissolution                                           | Reconstructed image in 3D view                                                        |
|---------------------------------|-------------------------------------------|-------------------------------------------------------------------------------------|--------------------------------------------------------------------------------------|---------------------------------------------------------------------------------------|
| $\text{KNO}_3$                  | 27.1                                      | 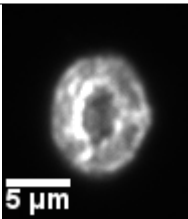   |    |    |
| $\text{KNO}_3 + \text{Mg}^{2+}$ | 23.2                                      |    |    |    |
| $\text{KNO}_3 + \text{HCO}_3^-$ | 34.7                                      |  |  |  |
| $\text{K}/2$                    | 26.8                                      |  |  |  |



## SUPPORTING INFORMATION

## Section 3 Redox chemistry of the acid precursor 1,4-dihydroxybenzene

1,4-dihydroxybenzene ( $H_2BQ$ ) is a redox-active species able to undergo a two-electron oxidation leading to the formation of benzoquinone (BQ) in aqueous solution. The first and second  $pK_a$ 's of  $H_2BQ$  at 25°C are 9.85 and 11.84, respectively.<sup>6</sup> Consequently at around neutral pH the  $H_2BQ$  is fully protonated. Consequently, as shown in the expression below oxidation of the  $H_2BQ$  leads to the release of two protons.

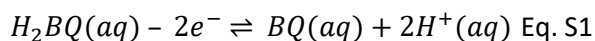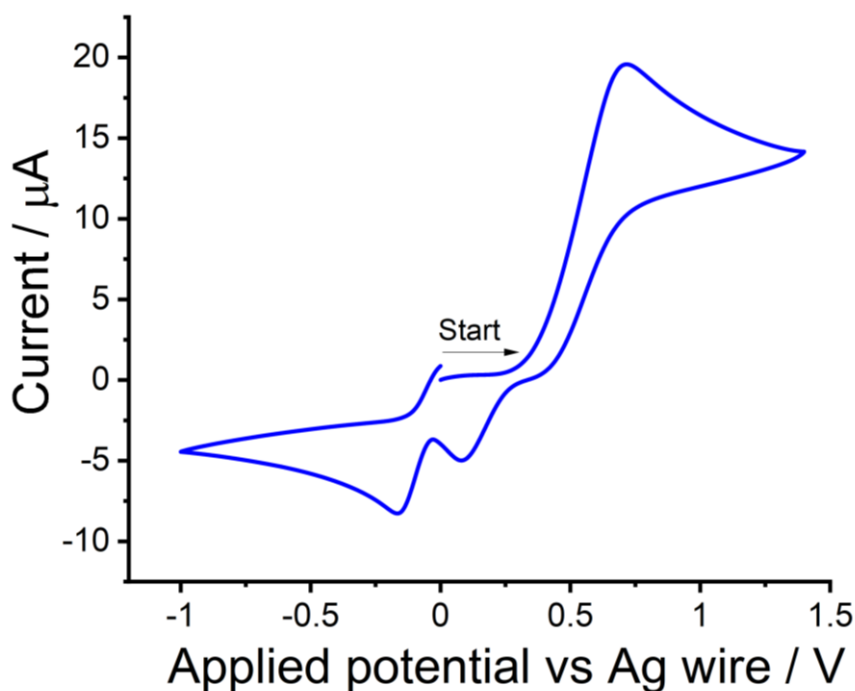

Figure S4: Cyclic voltammogram of 10mM  $H_2BQ$  in 0.7M  $KNO_3$  recorded in the opto-electrochemical cell at a voltage scan rate of  $50mVs^{-1}$ . The working electrode is a carbon fibre wire electrode (radius =  $3.5 \mu m$ , length  $\approx 1cm$ ). The potential was swept anodically from a starting potential of 0.0V to +1.4V vs Ag wire before reversing the sweep direction to -1.0V and stopped at 0.0V.

Figure S4 shows a cyclic voltammogram of 10mM  $H_2BQ$  recorded in 0.7M  $KNO_3$  electrolyte, recorded in the above discussed opto-electrochemical cell. The potential was swept from an initial potential of 0V anodically to +1.4V (vs Ag wire) at a voltage scan rate of  $50mVs^{-1}$ . A clear oxidative peak corresponding to the oxidation of the  $H_2BQ$  occurs at  $\sim +0.7V$  (vs Ag wire). In the absence of pH buffering species, although the electrolyte is initially neutral in pH the electrode interface quickly becomes highly acidic due to a buildup of protons generated electrochemically (Eq. S1). Thus, the forward anodic  $H_2BQ/BQ$  peak seen at +0.7V (vs Ag wire) in Figure S4 is similar to that reported in pH 2.0 buffered electrolyte.<sup>7</sup> From the cyclic voltammogram, it is clear that at an applied over-potential of +1.2V (vs Ag wire) the 2-electrons oxidation of  $H_2BQ$  is fully driven to generate BQ and 2 stoichiometric equivalents of protons.

## SUPPORTING INFORMATION

---

In this work the 1,4-dihydroxybenzene is used as an acid precursor which upon oxidation leads to the release of protons and hence a decrease in the pH local to the electrode. The spatial and temporal evolution of  $[H^+]$  in the opto-electrochemical cell is discussed in SI Section 5.

## SUPPORTING INFORMATION

## Section 4 Experimental calcite dissolution rate versus distance from the electrode

As discussed in Section 3, the pH gradient in the opto-electrochemical experiments is a function of both time and distance of coccolith from the electrode. Figure S5 shows the temporal change in the effective radius of *C.braudii* coccoliths situated at different distances from the electrode. The experiment was conducted in a buffer-free 0.7M  $\text{KNO}_3$  electrolyte solution. The y-axis shows a relative change in the effective coccolith radius as compared to that measured prior to the acid dissolution ( $t_{\text{pot.on}} = 0\text{s}$ ) so as to normalize for intra-speciation size differences. For coccoliths within  $\sim 70\mu\text{m}$  from the electrode, two linear slopes can be seen for the reasons discussed in the main text. An initial slope ( $\mu\text{m s}^{-1}$ ) can be extracted from the initial 3 seconds of dissolution, as can be seen in Figure S5 b); generally, the further the coccolith is away from the electrode, the initial dissolution rate is seen to be slower and requires a longer time for complete dissolution ( $r_{\text{eff}} = 0$ ). For coccoliths much further away from the electrode, such as the one at  $120\mu\text{m}$  shown in Figure S5 however, a delay of  $\sim 2.5\text{s}$  can be seen before the dissolution is initialized by electrochemically generated acid. This is entirely consistent with the diffusion of protons from the electrode interface outwards into the solution, in which a finite time is required for an appreciable amount of protons to reach a distance of hundreds of microns from the electrode – shown in SI Section 6.4.

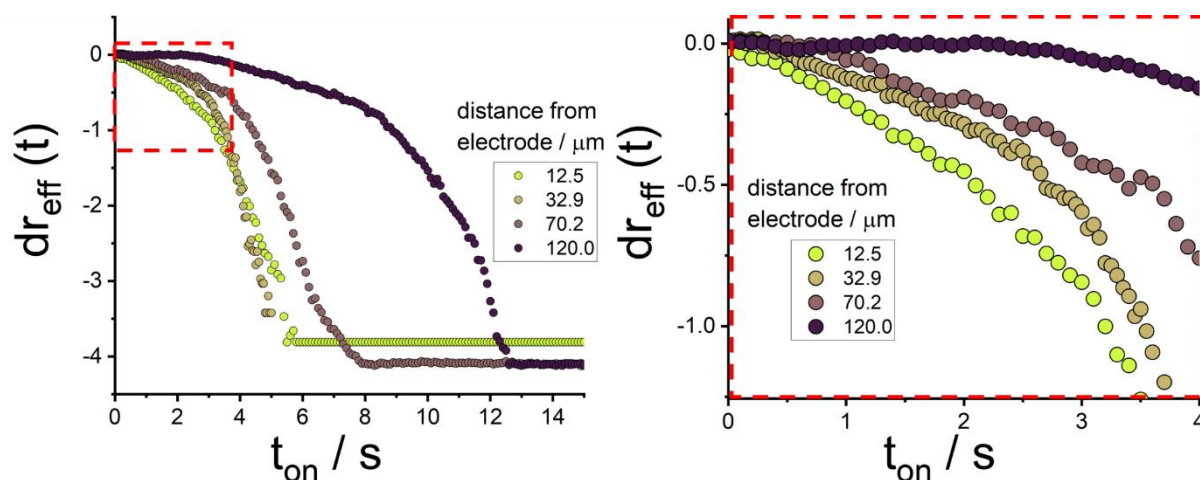

Figure S5. A plot of the change in the effective radius ( $dr_{\text{eff}}$ ) of *C.braudii* coccoliths during the opto-electrochemical experiments in 0.1M  $\text{KNO}_3$  electrolyte. The distance of the coccolith from the electrode is shown in the legend. The y-axis plots the change in relative to that at  $t_{\text{on}} = 0$ , allowing the gradient to be directly compared for intra-species variation in coccolith size.

## SUPPORTING INFORMATION

## Section 5 Mass-transport of electrochemically generated reagents: numerical simulation

The opto-electrochemical cell (depicted in Figure S2) consists of a carbon fibre working electrode ( $r_e = 3.5 \mu\text{m}$ ) in a cell volume of approximately  $1 \text{ cm} \times 1 \text{ cm} \times 100 \mu\text{m}$ . In previous work the authors' have shown that the concentration profile radial from the working electrode in the opto-electrochemical cell can be simulated by a hemi-cylinder of equivalent radius on a surface.<sup>8</sup> To a good approximation and when within a distance less than or equal to the cell-height from the electrode, the diffusion field remains radial and Fick's second law in cylindrical coordinates can be used to describe the solution phase mass-transport.<sup>8</sup> In the absence of coupled homogeneous kinetics the concentration of species  $i$ , is described by:

$$\frac{\partial [i]}{\partial t} = D_i \left( \frac{\partial^2 [i]}{\partial r^2} + \frac{2}{r} \frac{\partial [i]}{\partial r} \right) \quad \text{Eq. S2}$$

where  $t$  is time (s),  $r$  is the radial distance from the centre of the cylinder and  $D_i$  is the diffusion coefficient of the  $i^{\text{th}}$  species ( $\text{m}^2 \text{s}^{-1}$ ). We are concerned with the diffusional flux of protons (and  $\text{H}_2\text{BQ}$ ) to and from the cylindrical wire electrode. The initial conditions we simulate are

$$t = 0, r_e \leq r \leq r_{max}, [H_2BQ]_r = [H_2BQ]_{bulk}, [H^+]_r \text{ \& } [BQ]_r = 0 \text{mM} \quad \text{Eq. S3}$$

where  $r_e$  is the radius of the cylindrical electrode ( $r_e = 3.5 \mu\text{m}$ ),  $r_{max}$  is a point at a semi-infinite distance away from the electrode such that the concentration is unperturbed during the course of the reaction. The bulk and initial 1,4-dihydroxybenzene concentration is set to  $[H_2BQ]_{bulk} = 10 \text{mM}$  as per the opto-electrochemical experiment.

At the start of the opto-electrochemical experiments, the applied potential at the working electrode is stepped from  $0\text{V}$  to an over-potential of  $+1.2\text{V}$  (vs Ag wire) to drive the full two-electrons two-protons oxidation of  $\text{H}_2\text{BQ}(\text{aq})$  at the electrode-solution interface (more of which see SI section 3)

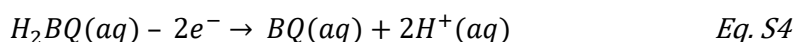

The electrochemical reaction occurs within an electron tunnelling distance from the working electrode, leading to a depletion of  $\text{H}_2\text{BQ}$  at the electrode-solution interface

$$t > 0, [H_2BQ]_{r_e} = 0 \quad \text{Eq. S5}$$

Concurrently, two protons are formed at the electrode-solution interface for each of  $\text{H}_2\text{BQ}$  undergoing oxidation

$$t > 0 \text{ \& } r = r_e, D_{H_2BQ} \frac{\partial [H_2BQ]}{\partial r} = -2D_{H^+} \frac{\partial [H^+]}{\partial r} \quad \text{Eq. S6}$$

Note that the electrogenerated  $\text{BQ}$  is not known to affect the dissolution kinetics of calcium carbonate and is not included in the simulation. The mass-transport of material is described by Fick's second law of diffusion in cylindrical coordinates Eq. S2

## SUPPORTING INFORMATION

$$t > 0 \ \& \ r_e < r < r_{max} \left\{ \begin{array}{l} \frac{\partial[H_2BQ]}{\partial t} = D_{H_2BQ} \left( \frac{\partial^2[H_2BQ]}{\partial r^2} + \frac{1}{r} \frac{\partial[H_2BQ]}{\partial r} \right) \\ \frac{\partial[H^+]}{\partial t} = D_{H^+} \left( \frac{\partial^2[H^+]}{\partial r^2} + \frac{1}{r} \frac{\partial[H^+]}{\partial r} \right) \end{array} \right. \quad Eq. S7$$

At the outer simulation boundary condition ( $r = r_{max}$ ) the bulk concentration is not perturbed during the timescale of the simulation.

$$r = r_{max} \left\{ \begin{array}{l} [H_2BQ]_{r_{max}} = [H_2BQ]_{bulk} \\ [H^+]_{r_{max}} = 0 \end{array} \right. \quad \text{where } r_{max} = r_e + 6 \sqrt{D_{H^+} t_{max}} \quad Eq. S8$$

The simulation is discretized using a finite difference method and solved back-implicitly. Numerical convergence, mass conservation and benchmark against known analytical expression is performed to ensure numerical accuracy.<sup>9</sup>

Figure S6 a) shows the predicted temporal ( $t$ ) and spatial ( $r$ ) evolution of proton concentration  $[H^+](r, t)$  within the opto-electrochemical cell. Similarly, Figure S6 b) depicts the proton profile as a function of time during the experiment, at difference distances from the electrode. We have not considered the consumption of the protons by the calcium carbonate and further we assume that the solution is unbuffered; experimentally this is equivalent to the case where 0.7 M  $KNO_3$  is used as the electrolyte. However, the simulation gives the concentration profile of the protons in the absence of being consumed at  $CaCO_3$  particle. Importantly the mass-transport to/from a microcylinder is convergent and consequently in this geometry the flux tends to a *quasi*-steady-state (“quasi” here denotes that in the longer time limit ( $t > r^2/D$ ) the flux to the cylinder is proportional to the inverse of log time, as opposed to truly time independent). As can be seen in Figure S6 b), within seconds of the opto-electrochemical experiment, the proton concentration at a distance  $r$  away from the electrode is above millimolar.

## SUPPORTING INFORMATION

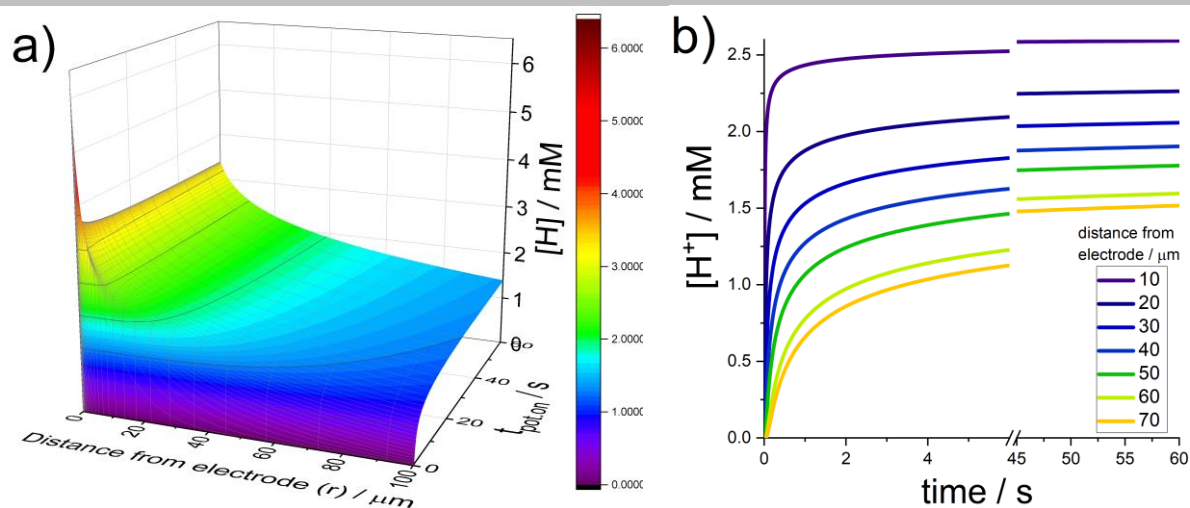

Figure S6. a) a plot of proton concentration profile as a function distance away from the cylindrical electrode ( $r_e = 3.5 \mu\text{m}$ ), at different time in the simulation. b) line plots of individual  $[H^+](t)$  profile at different distances from the cylindrical electrode. Other simulation parameters  $[H_2BQ]_{\text{bulk}} = 10 \text{mM}$ ,  $D_{H_2BQ} = 1.2 \times 10^{-9} \text{m}^2\text{s}^{-1}$ ,  $D_{H^+} = 7.4 \times 10^{-9} \text{m}^2\text{s}^{-1}$ .

## SUPPORTING INFORMATION

## Section 6 Calcite particle dissolution kinetics

In this section, the acid dissolution of quasi-spherical-shaped calcite particles is first discussed. Upon exposure of the calcite to a homogeneous acidic chemical environment, the following chemical reaction occurs

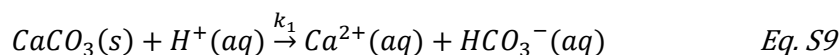

where  $k_1$  is the heterogeneous rate constant ( $\text{cm s}^{-1}$ ). There are two important limits for this reaction. First, the reaction may be limited by the mass-transport of protons to the calcite interface. Second, the reaction may be limited by the surface reaction rate. As will be outlined below the switch in rate determining step is predominantly controlled by the size of the particle and the surface reaction rate. In previous work, using a channel-flow reactor and through electrochemically measuring the proton concentration downstream of a macro-sized Icelandic Spar (calcite) crystal a  $k_1$  of  $0.043(\pm 0.015) \text{ cm s}^{-1}$  has been measured. This value was obtained at  $\text{pH} < 4.0$  in the inert electrolyte, KCl. Note that the term 'inert' means that neither  $\text{K}^+$  nor  $\text{Cl}^-$  are known to complex with the chemicals appearing in Eq. S9, thus the present of which is purely as electrolyte and does not affect the rate of calcite dissolution.

## 6.1 Surface reaction kinetics

The reaction flux at the particle-solution interface can be expressed as

$$D_{\text{Ca}^{2+}} \left. \frac{\partial[\text{Ca}^{2+}]}{\partial r} \right|_{r=r_{\text{particle}}} = -D_{\text{H}^+} \left. \frac{\partial[\text{H}^+]}{\partial r} \right|_{r=r_{\text{particle}}} = -k_1 [\text{H}^+]_{\text{surface}} \quad \text{Eq. S10}$$

where  $r$  is radial distance from the centre of the spherical calcite particle,  $r_{\text{particle}}$  is the radius of calcite particle,  $D_j$  is the diffusion coefficient of species  $j$  and  $[j]$  is the concentration of species  $j$ . The subscript 'surface' denotes the surface concentration at the particle-solution interface.

For every mole of  $\text{Ca}^{2+}(aq)$  released into the solution, one mole of  $\text{CaCO}_3(s)$  must have reacted with acid. Therefore, it is helpful to express Eq. S10 in terms of the rate in change of the particle size. First, the reaction flux (Eq. S10) is multiplied by the surface area of the calcite particle to obtain the rate of reaction

$$D_{\text{Ca}^{2+}} \left. \frac{\partial[\text{Ca}^{2+}]}{\partial r} \right|_{r=r_{\text{particle}}} * \text{Area} = \frac{\partial(\text{mols of CaCO}_3(s))}{\partial t} = -k_1 [\text{H}^+]_{\text{surface}} * \text{Area} \quad \text{Eq. S11}$$

Since the number of moles of  $\text{CaCO}_3(s)$  in a spherical calcite particle is equal to the volume multiplied by the density of calcite ( $\rho_{\text{CaCO}_3} = 2.71 \times 10^{-4} \text{ mol m}^{-3}$ ), Eq. S11 becomes

$$\frac{\partial(\text{mols of CaCO}_3(s))}{\partial t} = \frac{\partial(V * \rho_{\text{CaCO}_3})}{\partial t} = -k_1 [\text{H}^+]_{\text{surface}} 4\pi r_{\text{particle}}^2 \quad \text{Eq. S12}$$

using chain rule,  $\frac{\partial V}{\partial t}$  can be expressed in terms of  $\frac{\partial r_{\text{particle}}}{\partial t}$

$$\frac{\partial V}{\partial t} = \frac{\partial V}{\partial r_{\text{particle}}} \frac{\partial r_{\text{particle}}}{\partial t} = 4\pi r_{\text{particle}}^2 \frac{\partial r_{\text{particle}}}{\partial t} \quad \text{Eq. S13}$$

Substituting Eq. S13 into Eq. S12 and rearranging give

## SUPPORTING INFORMATION

$$\frac{\partial r_{particle}}{\partial t} = -\frac{k_1}{\rho_{CaCO_3}} [H^+]_{surface} \quad Eq. S14$$

Eq. S14 describes the rate of particle shrinkage for a perfectly smooth spherical calcite particle dissolving under a highly acid chemical environment (pH<4.0) with nothing else present in the solution other than inert electrolytes. In other words, it describes the rate in the absence of calcite dissolution inhibitors. Since  $k_1$ , and  $\rho_{CaCO_3}$  are constants, the rate of particle shrinkage is directly proportional to the proton concentration at the particle-solution interface. The higher the surface proton concentration, the quicker the calcite dissolves and shrink.

In opto-electrochemical experiments, the dissolution of coccoliths were not only conducted in inert electrolytes (0.7M KNO<sub>3</sub>) but also in phytoplankton culture mediums. Note that KNO<sub>3</sub> is considered inert because neither K<sup>+</sup> (as above) nor NO<sub>3</sub><sup>-</sup> are not known to complex with chemicals involved in the calcite dissolution reaction. The phytoplankton culture medium contains a mixture of electrolytes, minerals, nutrients and metal ion chelators, not too dissimilar to those found in natural seawater. Notably, this includes 54mM of Mg<sup>2+</sup> (aq) and 2.4mM of Eq. S14 is generalized to

$$\frac{\partial r_{particle}}{\partial t} = -\frac{k_1 c_p}{\rho_{CaCO_3}} [H^+]_{surface} \quad Eq. S15$$

where an additional variable  $c_p$  has been added to account for the fact that the interfacial kinetics may deviate from the case of an idealized smooth spherical particle. Notably, the surface roughness of the calcite particle will serve to increase the rate ( $c_p > 1$ ), whereas as demonstrated by data shown in the main text and Table S3, the presence of a carbonate buffer and magnesium ions also decrease the reaction rate. Trace metal and organic carbon impurities within biogenic coccoliths may also affect  $c_p$ .

## 6.2 Mass-transport and the effect of particle size

The expression for the rate of dissolution given in Eq. S15 is proportional to the surface proton concentration. For an *isolated* particle we can consider how this surface proton concentration varies during the course of a reaction.

To approach this problem we simulate the surface proton concentration at a spherical calcite particle when exposed to a highly acidic solution. At  $t = 0$ , a spherical calcite particle is exposed to a homogeneous solution of proton  $[H^+]_{bulk}$ . The proton concentration is initially homogeneous throughout the solution

$$t = 0, r_{particle} \leq r \leq r_{max}: [H^+]_r = [H^+]_{bulk} \quad Eq. S16$$

At  $t > 0$ , acid dissolution reaction at the particle surface leads to a consumption of proton, at a rate described by Eq. S14, accompanied by a concomitant replenishment of protons, diffusing down the concentration gradient from the semi-infinite bulk solution as described by Fickian diffusion laws (Eq. S2). The boundary conditions at  $t > 0$  are:



## SUPPORTING INFORMATION

$$t > 0 \begin{cases} r = r_{particle}, & D_{H^+} \frac{\partial [H^+]}{\partial r} \Big|_{r=r_{particle}} = -k_1 [H^+]_{surface} \\ r_{particle} < r < r_{max}, & \frac{\partial [H^+]}{\partial t} = D_{H^+} \left( \frac{\partial^2 [H^+]}{\partial r^2} + \frac{2}{r} \frac{\partial [H^+]}{\partial r} \right) \\ r = r_{max}, & [H^+]_{r_{max}} = [H^+]_{bulk} \end{cases}$$

Eq. S17

where  $[H^+]$  is the concentration of protons (mol m<sup>-3</sup>),  $D_{H^+}$  is the diffusion coefficient of  $H^+$  (mol m<sup>-2</sup>),  $t$  is time (s),  $r$  is the distance from the centre of particle and  $r_{max}$  is, again, a distance sufficient far away from the particle interface such that the concentration at  $r_{max}$  is unperturbed from the bulk concentration during the simulation

$$r_{max} = r_{particle} + 6\sqrt{D_{H^+}t_{max}} \quad \text{Eq. S18}$$

As in Section 5, the differential equations are discretized using finite difference methods and solved backwards implicitly.<sup>11</sup> The simulation was benchmarked thoroughly with analytical expressions including tests such as conservation of mass and convergence study, more of which is detailed in authors' previous work.<sup>9</sup>

Figure S7 shows the  $[H^+]_{surface}$  as a function of time for 'smooth' spherical calcite particles with different radius. As can be seen, a steady-state  $[H^+]_{surface}$  is reached within a couple of seconds of simulation as a result of the high diffusion coefficient of  $H^+$  in aqueous solution. As the size of particle increases from sub-micron to larger than 10 microns, the  $[H^+]_{surface}$  at steady-state is seen to decrease to a value less than 60% of the bulk proton concentration; this is a classic change in the convergent diffusion regime for when the particle size is small compare to the diffusion layer thickness, to that of a 'linear' diffusion regime when the particle size is big compare to the diffusion layer thickness.

Figure S8 plots the steady-state  $[H^+]_{surface}$  for particle with different surface roughness, as expressed by increasing the value of  $c_p$  in equation Eq. S15. As the surface of the particle becomes rougher (high  $c_p$ ), more surface-area of calcite is available to react, thus leading to a decrease in the surface proton concentration.

## SUPPORTING INFORMATION

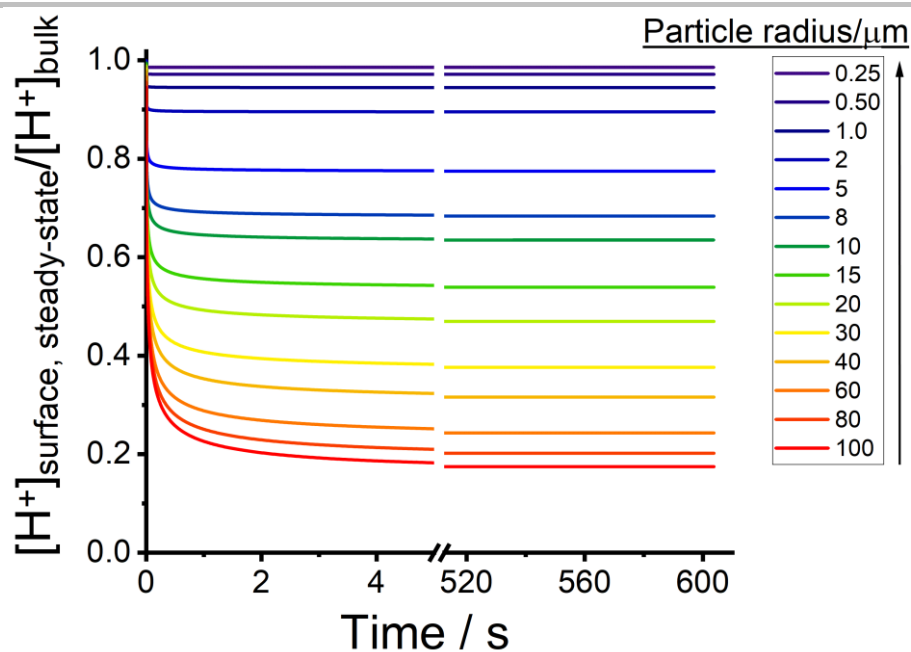

Figure S7. A plot of surface proton concentration with time, normalized to the bulk concentration of protons. Other simulation parameters:  $k_1 = 0.043 \text{ cm s}^{-1}$ ,  $D_{H^+} = 7.4 \times 10^{-9} \text{ m}^2 \text{ s}^{-1}$ ,  $c_p = 1$  and the range of  $r_{\text{particle}}$  is shown in graph legend (0.25 – 100  $\mu\text{m}$ ).

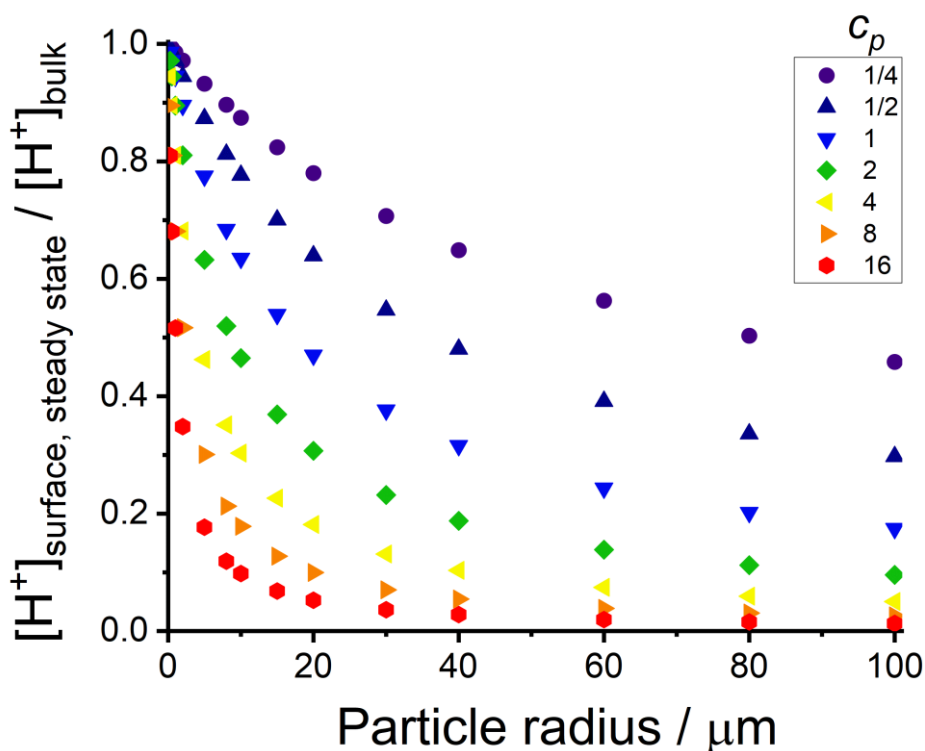

Figure S8. A plot of the steady-state surface proton concentration, relative to the bulk concentration, as a function of both the radius of the particle and  $c_p$  values. Other simulation parameters:  $k_1 = 0.043 \text{ cm s}^{-1}$ ,  $D_{H^+} = 7.4 \times 10^{-9} \text{ m}^2 \text{ s}^{-1}$  and the range of  $r_{\text{particle}}$  and  $c_p$  is shown in the plot.

In the main text of this study, the dissolution of coccoliths is analysed as of disk-like calcite particles with a non-unity surface roughness factor. The largest of all species in this study (*C. braudii*) has a typical coccolith thickness

## SUPPORTING INFORMATION

---

of 1-2  $\mu\text{m}$  and  $r_{eff} < 6 \mu\text{m}$ . It can be inferred from Figure S8 that if a calcite particle, with equivalent dimensions to that of a coccolith, were to be exposed to a strong acidic chemical environment, the deviation in  $[H^+]_{surface}$  is no more than  $\sim 30\%$  from  $[H^+]_{bulk}$ . For the smaller types of coccoliths, such as those found bearing on *E.huxleyi* (typically measured thickness  $< 0.7 \mu\text{m}$  and  $r_{eff} < 2.5\mu\text{m}$ ) the  $[H^+]_{surface}$  is approximately equal to  $[H^+]_{bulk}$ . Therefore, the dissolution of coccoliths in a strong acidic environment occurs within a regime controlled by the surface reaction rate ( $[H^+]_{surface} \approx [H^+]_{bulk}$ ), and not the mass-transport of protons to the particle ( $[H^+]_{surface} \approx 0$ ).

### 6.3 Experimental verification of the dissolution kinetics

In order to verify the above model, the dissolution of a solid calcite particle was studied in the electrochemical cell. Figure S9 shows the rate of calcite particle shrinkage ( $r_{eff} = 5.4 \mu\text{m}$ ) when exposed to the strong acidic environment, the experimental conditions mirror those used in the coccolith in the opto-electrochemical experiment. The purple squares and red dots represents two approaches in quantifying the particle size from image analysis. The green dashed line is the expected dissolution rate for a solid particle as numerically predicted based on the above model and where  $c_p = 1$ . The initial slope ( $\mu\text{m s}^{-1}$ ) within the first tens of seconds matches with excellent agreement to that numerically predicted rate of shrinkage when  $[H^+]_{surface} = [H^+](r, t)$ ; where  $[H^+](r, t)$  is the numerically simulated proton concentration in the opto-electrochemical experiment – see SI section 5. Notice the initial slope deviates from linearity after 20 seconds is similar to the ‘dog leg’ kinetics seen with the dissolution of coccoliths. This is due to the start of the dissolution of the calcite particle perpendicular to the projection plane of the 2D image.

## SUPPORTING INFORMATION

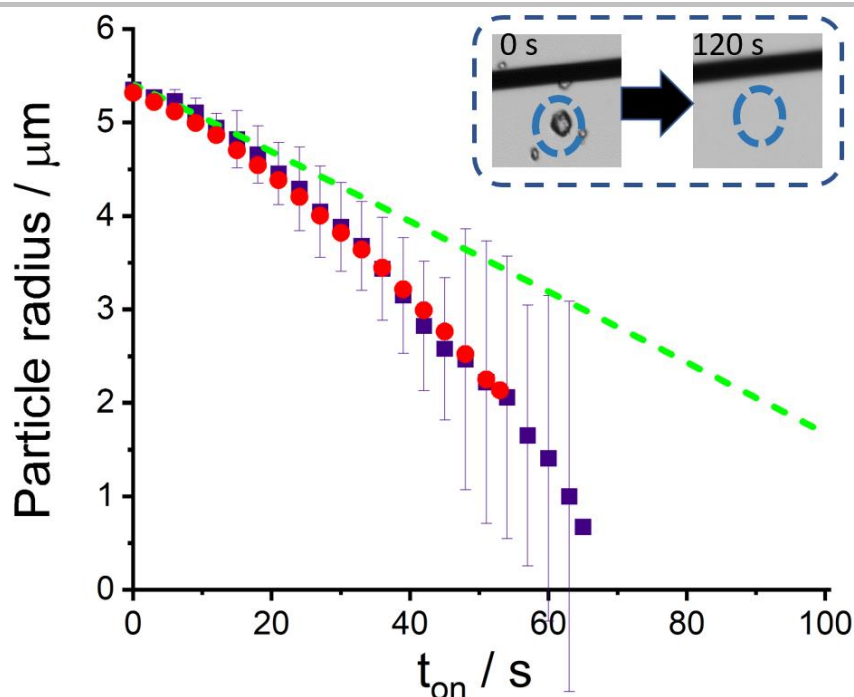

Figure S9. The change in the particle radius of a quasi-spherical detrital calcite particle with time(s) at a distance of  $16\mu\text{m}$  from the carbon-fibre wire electrode ( $r_e = 3.5\mu\text{m}$ ). At the start of the experiment ( $t_{\text{on}} = 0\text{s}$ ), the potential applied to the wire electrode is step from  $0\text{V}$  to  $+1.2\text{V}$  (vs Ag wire) to fully drive the oxidation of  $10\text{mM H}_2\text{BQ}(\text{aq})$  in the  $0.7\text{M KNO}_3$  electrolyte. The dissolution of the detrital particle analysis via two approaches: purple square – the particle radius measured from the centre of mass (average with error bar) and the red dots is the  $r_{\text{eff}}$  calculated from the projection area after image threshold, where  $\pi r_{\text{eff}}^2 = \text{area}$ . Overlaid in green dotted line is the predicted dissolution rate occurs at surface-area controlled, more of which see below. Inlay shows the detrital particle at  $t_{\text{on}} = 0\text{s}$  and at  $t_{\text{on}} = 120\text{s}$ .

#### 6.4 Numerically predicted dissolution kinetics of a calcite particle as a function of distance from the electrode

Figure S10 predicts the shrinkage of perfectly spherical solid calcite particles in the opto-electrochemical experiment. The change in particle-size as a function of time is calculated via Eq. S15, using the proton concentration profile  $[H^+](r, t)$  shown in Figure S6 – simulated for an inert electrolyte ( $c_p = 1$ ). The initial dissolution rate,  $(dr_{\text{particle}}/dt)$  in Figure S10, is shown to be sensitive to the distance of particle from the electrode, with a faster dissolution rate for particle near to the electrode. A particle distance of  $70\mu\text{m}$  from the electrode, however, the dissolution rate at  $t \approx 0\text{s}$  is sluggish due to the finite time required for the proton to diffusion from the electrode, but over the course of  $\sim 2\text{-}3\text{s}$ , the slope is approximately averaged to a constant value. This is fully consistent with that seen experimental for dissolution of coccolith, as shown in Figure S5.

## SUPPORTING INFORMATION

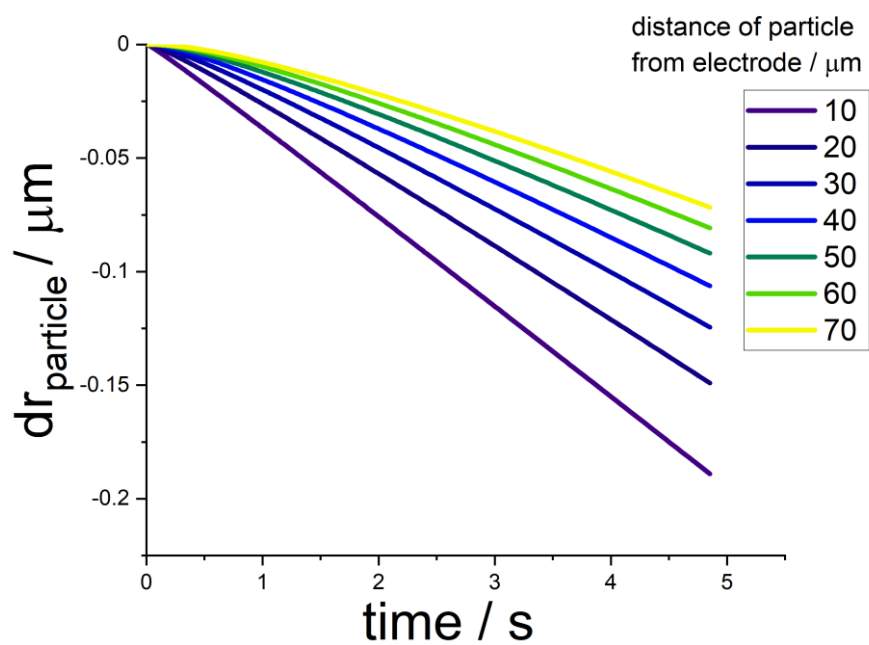

Figure S10. Shrinkage of solid calcite particles ( $c_p = 1$ ) as a function of time in the opto-electrochemical cell. The particle distance from the electrode ( $r$ ) is shown in the legend. The proton concentration  $[H](r, t)$  used for the calculation is reported in Figure S6.

## SUPPORTING INFORMATION

## Section 7 Coccolith data

The table below tabulates all coccolith data shown in the main text.

**Table S3.** Tabulated Coccolith data from opto-electrochemical experiments. Distance from electrode was measured from the electrode edge to coccolith centre. All the electrolyte has an addition of 10mM H<sub>2</sub>BQ acid precursor prior to the experiment. The concentration of the chemical components are: 0.7M KNO<sub>3</sub>, 54.6mM Mg<sup>2+</sup> and 2.4mM HCO<sub>3</sub><sup>-</sup>. See SI Section 1.2 for K/2 culture medium. Effective radius ( $r_{eff}$ ) was calculated from the coccoliths projection area measured after image threshold ( $Area = \pi r_{eff}^2$ ). Coccolith length denotes the longest length of the coccolith, which is equivalent to the major axis for elliptical liths. The initial slope was the initial dissolution rate  $dr_{eff}/dt$ , obtained from  $t_{on} = 0s$  as shown in Figure S5. Maximum thickness was obtained from the coccolith volume reconstruction.  $c_p$  was the factor increase in dissolution rate as compared to a smooth and solid calcite particle with radius  $r_{eff}$ . Coccolith volume was obtained from image reconstruction and coccolith mass was estimated using a calcite density of 2.71 g cm<sup>-3</sup>.

| Species           | Electrolyte                         | Distance from electrode / $\mu\text{m}$ | $r_{eff}$ / $\mu\text{m}$ | Coccolith length / $\mu\text{m}$ | Initial slope / $\mu\text{m s}^{-1}$ | Maximum thickness / $\mu\text{m}$ | $c_p$ | Coccolith volume / $\mu\text{m}^3$ | Coccolith mass / pg |
|-------------------|-------------------------------------|-----------------------------------------|---------------------------|----------------------------------|--------------------------------------|-----------------------------------|-------|------------------------------------|---------------------|
| <i>C.braaudii</i> | KNO <sub>3</sub>                    | 13.5                                    | 4.1                       | 8.6                              | 0.16                                 | 0.9                               | 4.4   | 31.0                               | 82.3                |
| <i>C.braaudii</i> | KNO <sub>3</sub>                    | 32.9                                    | 3.4                       | 7.6                              | 0.16                                 | 0.8                               | 6.3   | 21.0                               | 53.9                |
| <i>C.braaudii</i> | KNO <sub>3</sub>                    | 33.2                                    | 2.9                       | 7.0                              | 0.12                                 | 0.5                               | 4.8   | 15.0                               | 40.7                |
| <i>C.braaudii</i> | KNO <sub>3</sub>                    | 32.8                                    | 3.9                       | 7.9                              | 0.11                                 | 0.8                               | 4.1   | 32.0                               | 53.4                |
| <i>C.braaudii</i> | KNO <sub>3</sub>                    | 42.8                                    | 5.1                       | 10.8                             | 0.06                                 | 1.2                               | 5.5   | 105.0                              | 159.9               |
| <i>C.braaudii</i> | KNO <sub>3</sub>                    | 61.2                                    | 3.8                       | 7.7                              | 0.06                                 | 0.4                               | 5.5   | 26.6                               | 21.4                |
| <i>C.braaudii</i> | KNO <sub>3</sub>                    | 79.0                                    | 4.4                       | 8.8                              | 0.13                                 | 0.9                               | 5.7   | 42.5                               | 115.2               |
| <i>C.braaudii</i> | KNO <sub>3</sub>                    | 42.4                                    | 5.0                       | 10.6                             | 0.16                                 | 1.4                               | 8.2   | 72.8                               | 197.3               |
| <i>C.braaudii</i> | KNO <sub>3</sub>                    | 54.3                                    | 4.3                       | 9.9                              | 0.10                                 | 0.7                               | 7.1   | 27.2                               | 73.7                |
| <i>C.braaudii</i> | KNO <sub>3</sub>                    | 70.2                                    | 4.8                       | 10.2                             | 0.13                                 | 1.0                               | 12    | 42.5                               | 115.2               |
| <i>C.braaudii</i> | KNO <sub>3</sub>                    | 40.8                                    | 4.5                       | 10.2                             | 0.10                                 | 0.9                               | 5.4   | 38.4                               | 104.1               |
| <i>C.braaudii</i> | KNO <sub>3</sub>                    | 21.2                                    | 4.6                       | 10.0                             | 0.13                                 | 1.1                               | 4.5   | 45.6                               | 123.6               |
| <i>C.braaudii</i> | KNO <sub>3</sub>                    | 34.5                                    | 4.0                       | 9.2                              | 0.19                                 | 1.1                               | 8.7   | 34.6                               | 93.8                |
| <i>C.braaudii</i> | KNO <sub>3</sub>                    | 11.4                                    | 4.7                       | 10.2                             | 0.20                                 | 2.0                               | 5.4   | 72.6                               | 196.7               |
| <i>C.braaudii</i> | KNO <sub>3</sub>                    | 27.1                                    | 4.6                       | 10.6                             | 0.087                                | 1.1                               | 3.6   | 50.3                               | 136.3               |
| <i>C.braaudii</i> | KNO <sub>3</sub>                    | 27.7                                    | 5.1                       | 11.3                             | 0.12                                 | 2.1                               | 5.1   | 98.9                               | 268.0               |
| <i>C.braaudii</i> | KNO <sub>3</sub>                    | 29.2                                    | 4.5                       | 9.8                              | 0.082                                | 1.2                               | 3.5   | 50.2                               | 136.0               |
| <i>C.braaudii</i> | KNO <sub>3</sub>                    | 12.5                                    | 3.8                       | 8.3                              | 0.24                                 | 1.3                               | 7.0   | 36.3                               | 98.4                |
| <i>C.braaudii</i> | KNO <sub>3</sub>                    | 21.6                                    | 4.8                       | 11.5                             | 0.27                                 | 1.4                               | 9.5   | 68.5                               | 185.6               |
| <i>C.braaudii</i> | KNO <sub>3</sub>                    | 10.1                                    | 5.1                       | 9.3                              | 0.47                                 | 2.1                               | 12    | 62.8                               | 170.2               |
| <i>C.braaudii</i> | KNO <sub>3</sub>                    | 40.3                                    | 4.3                       | 9.4                              | 0.16                                 | 1.0                               | 7.9   | 37.9                               | 102.7               |
| <i>C.braaudii</i> | KNO <sub>3</sub> + Mg <sup>2+</sup> | 23.1                                    | 3.3                       | 7.6                              | 0.15                                 | 0.5                               | 5.1   | 8.5                                | 23.1                |
| <i>C.braaudii</i> | KNO <sub>3</sub> + Mg <sup>2+</sup> | 35.2                                    | 4.2                       | 9.3                              | 0.094                                | 0.6                               | 4.0   | 20.0                               | 54.3                |
| <i>C.braaudii</i> | KNO <sub>3</sub> + Mg <sup>2+</sup> | 86.3                                    | 5.3                       | 10.8                             | 0.10                                 | 1.3                               | 8.4   | 73.1                               | 198.1               |
| <i>C.braaudii</i> | KNO <sub>3</sub> + Mg <sup>2+</sup> | 15.3                                    | 3.6                       | 8.0                              | 0.17                                 | 0.9                               | 5.1   | 17.3                               | 46.9                |
| <i>C.braaudii</i> | KNO <sub>3</sub> + Mg <sup>2+</sup> | 22.2                                    | 4.7                       | 10.4                             | 0.20                                 | 1.8                               | 6.9   | 82.7                               | 224.1               |
| <i>C.braaudii</i> | KNO <sub>3</sub> + Mg <sup>2+</sup> | 23.2                                    | 4.9                       | 10.4                             | 0.11                                 | 1.1                               | 3.7   | 54.7                               | 148.2               |
| <i>C.braaudii</i> | KNO <sub>3</sub> + Mg <sup>2+</sup> | 34.7                                    | 4.0                       | 9.7                              | 0.15                                 | 1.2                               | 6.1   | 34.5                               | 93.5                |
| <i>C.braaudii</i> | KNO <sub>3</sub> + Mg <sup>2+</sup> | 38.5                                    | 3.9                       | 9.1                              | 0.13                                 | 1.2                               | 5.6   | 39.5                               | 107.0               |
| <i>C.braaudii</i> | KNO <sub>3</sub> + Mg <sup>2+</sup> | 50.7                                    | 4.5                       | 9.6                              | 0.14                                 | 1.0                               | 7.2   | 34.4                               | 93.2                |
| <i>C.braaudii</i> | KNO <sub>3</sub> + Mg <sup>2+</sup> | 57.3                                    | 4.7                       | 9.9                              | 0.072                                | 1.0                               | 4.2   | 44.2                               | 119.8               |
| <i>C.braaudii</i> | KNO <sub>3</sub> + Mg <sup>2+</sup> | 70.2                                    | 4.8                       | 10.6                             | 0.053                                | 0.7                               | 3.6   | 34.1                               | 92.4                |
| <i>C.braaudii</i> | KNO <sub>3</sub> + Mg <sup>2+</sup> | 17.5                                    | 4.9                       | 10.2                             | 0.042                                | 0.6                               | 1.3   | 24.9                               | 67.5                |
| <i>C.braaudii</i> | KNO <sub>3</sub> + Mg <sup>2+</sup> | 27.2                                    | 4.4                       | 9.9                              | 0.046                                | 0.6                               | 1.7   | 29.0                               | 78.5                |
| <i>C.braaudii</i> | KNO <sub>3</sub> + Mg <sup>2+</sup> | 24.9                                    | 4.9                       | 10.8                             | 0.063                                | 1.0                               | 2.3   | 45.6                               | 123.6               |
| <i>C.braaudii</i> | KNO <sub>3</sub> + Mg <sup>2+</sup> | 26.7                                    | 3.9                       | 9.2                              | 0.088                                | 0.9                               | 3.2   | 28.4                               | 77.0                |
| <i>C.braaudii</i> | KNO <sub>3</sub> + Mg <sup>2+</sup> | 28.6                                    | 5.0                       | 11.4                             | 0.10                                 | 1.3                               | 3.9   | 66.3                               | 179.7               |
| <i>C.braaudii</i> | KNO <sub>3</sub> + Mg <sup>2+</sup> | 44.4                                    | 4.1                       | 7.9                              | 0.085                                | 0.8                               | 4.2   | 29.4                               | 79.7                |

## SUPPORTING INFORMATION

| Species           | Electrolyte                     | Distance from electrode / $\mu\text{m}$ | $r_{\text{eff}}$ / $\mu\text{m}$ | Coccolith length / $\mu\text{m}$ | Initial slope / $\mu\text{m s}^{-1}$ | Maximum thickness / $\mu\text{m}$ | $c_p$ | Coccolith volume / $\mu\text{m}^3$ | Coccolith mass / $\mu\text{g}$ |
|-------------------|---------------------------------|-----------------------------------------|----------------------------------|----------------------------------|--------------------------------------|-----------------------------------|-------|------------------------------------|--------------------------------|
| <i>C.braaudii</i> | $\text{KNO}_3 + \text{Mg}^{2+}$ | 65.6                                    | 4.5                              | 9.9                              | 0.053                                | 0.7                               | 3.4   | 28.8                               | 78.0                           |
| <i>C.braaudii</i> | $\text{KNO}_3 + \text{Mg}^{2+}$ | 48.3                                    | 3.6                              | 8.3                              | 0.085                                | 0.7                               | 4.4   | 22.6                               | 61.2                           |
| <i>C.braaudii</i> | $\text{KNO}_3 + \text{Mg}^{2+}$ | 51.2                                    | 3.4                              | 8.0                              | 0.099                                | 0.7                               | 5.3   | 21.2                               | 57.5                           |
| <i>C.braaudii</i> | $\text{KNO}_3 + \text{Mg}^{2+}$ | 27.6                                    | 4.7                              | 10.5                             | 0.14                                 | 1.2                               | 5.4   | 56.0                               | 151.7                          |
| <i>C.braaudii</i> | $\text{KNO}_3 + \text{Mg}^{2+}$ | 29.6                                    | 3.7                              | 8.3                              | 0.14                                 | 1.0                               | 5.3   | 27.5                               | 74.5                           |
| <i>C.braaudii</i> | $\text{KNO}_3 + \text{Mg}^{2+}$ | 64.1                                    | 3.8                              | 8.9                              | 0.072                                | 0.6                               | 4.6   | 18.6                               | 50.4                           |
| <i>C.braaudii</i> | $\text{KNO}_3 + \text{HCO}_3^-$ | 34.7                                    | 5.3                              | 11.4                             | 0.13                                 | 2.1                               | 5.5   | 110.5                              | 299.5                          |
| <i>C.braaudii</i> | $\text{KNO}_3 + \text{HCO}_3^-$ | 86.3                                    | 4.3                              | 9.4                              | 0.054                                | 1.1                               | 4.4   | 40.0                               | 108.4                          |
| <i>C.braaudii</i> | $\text{KNO}_3 + \text{HCO}_3^-$ | 86.9                                    | 5.1                              | 11.0                             | 0.055                                | 1.2                               | 4.5   | 64.4                               | 174.5                          |
| <i>C.braaudii</i> | $\text{KNO}_3 + \text{HCO}_3^-$ | 16.5                                    | 3.9                              | 9.4                              | 0.13                                 | 1.1                               | 3.9   | 37.4                               | 101.3                          |
| <i>C.braaudii</i> | $\text{KNO}_3 + \text{HCO}_3^-$ | 56.1                                    | 4.5                              | 10.5                             | 0.045                                | 1.0                               | 2.6   | 38.0                               | 103.0                          |
| <i>C.braaudii</i> | $\text{KNO}_3 + \text{HCO}_3^-$ | 22.5                                    | 4.8                              | 10.8                             | 0.13                                 | 1.7                               | 4.6   | 71.7                               | 194.3                          |
| <i>C.braaudii</i> | $\text{KNO}_3 + \text{HCO}_3^-$ | 59.8                                    | 4.2                              | 9.5                              | 0.032                                | 0.6                               | 1.9   | 25.1                               | 68.0                           |
| <i>C.braaudii</i> | $\text{KNO}_3 + \text{HCO}_3^-$ | 18.5                                    | 4.3                              | 9.4                              | 0.16                                 | 2.3                               | 5.0   | 64.9                               | 175.9                          |
| <i>C.braaudii</i> | $\text{KNO}_3 + \text{HCO}_3^-$ | 7.6                                     | 4.5                              | 9.8                              | 0.12                                 | 1.4                               | 2.9   | 51.5                               | 139.6                          |
| <i>C.braaudii</i> | $\text{KNO}_3 + \text{HCO}_3^-$ | 5.8                                     | 3.8                              | 8.5                              | 0.15                                 | 1.3                               | 3.5   | 27.9                               | 75.5                           |
| <i>C.braaudii</i> | $\text{KNO}_3 + \text{HCO}_3^-$ | 6.5                                     | 3.8                              | 7.9                              | 0.11                                 | 1.1                               | 2.5   | 27.7                               | 75.1                           |
| <i>C.braaudii</i> | $\text{KNO}_3 + \text{HCO}_3^-$ | 10.6                                    | 4.1                              | 8.5                              | 0.043                                | 0.9                               | 1.1   | 30.5                               | 82.6                           |
| <i>C.braaudii</i> | $\text{KNO}_3 + \text{HCO}_3^-$ | 20.4                                    | 4.6                              | 8.8                              | 0.031                                | 0.6                               | 1.0   | 26.1                               | 70.6                           |
| <i>C.braaudii</i> | $\text{KNO}_3 + \text{HCO}_3^-$ | 11.4                                    | 4.7                              | 10.8                             | 0.15                                 | 1.5                               | 4.1   | 58.1                               | 157.4                          |
| <i>C.braaudii</i> | $\text{KNO}_3 + \text{HCO}_3^-$ | 19.5                                    | 3.8                              | 8.1                              | 0.18                                 | 1.0                               | 5.9   | 24.0                               | 65.1                           |
| <i>C.braaudii</i> | $\text{KNO}_3 + \text{HCO}_3^-$ | 23.9                                    | 4.4                              | 9.3                              | 0.098                                | 0.9                               | 3.5   | 35.9                               | 97.2                           |
| <i>C.braaudii</i> | $\text{KNO}_3 + \text{HCO}_3^-$ | 23.9                                    | 4.9                              | 10.2                             | 0.13                                 | 1.1                               | 4.5   | 48.8                               | 132.3                          |
| <i>C.braaudii</i> | $\text{KNO}_3 + \text{HCO}_3^-$ | 47.2                                    | 4.1                              | 8.6                              | 0.091                                | 0.8                               | 4.6   | 31.9                               | 86.4                           |
| <i>C.braaudii</i> | $\text{KNO}_3 + \text{HCO}_3^-$ | 9.4                                     | 3.9                              | 8.3                              | 0.29                                 | 2.1                               | 7.3   | 71.7                               | 194.4                          |
| <i>C.braaudii</i> | $\text{KNO}_3 + \text{HCO}_3^-$ | 9.7                                     | 3.9                              | 9.4                              | 0.080                                | 0.9                               | 2.0   | 32.8                               | 88.9                           |
| <i>C.braaudii</i> | K/2                             | 41.9                                    | 5.0                              | 10.9                             | 0.12                                 | 1.7                               | 5.8   | 90.8                               | 246.0                          |
| <i>C.braaudii</i> | K/2                             | 10.6                                    | 4.7                              | 10.7                             | 0.076                                | 1.9                               | 2.0   | 77.9                               | 211.2                          |
| <i>C.braaudii</i> | K/2                             | 26.8                                    | 4.8                              | 10.1                             | 0.070                                | 1.5                               | 2.6   | 68.9                               | 186.6                          |
| <i>C.braaudii</i> | K/2                             | 33.5                                    | 5.0                              | 10.5                             | 0.059                                | 1.7                               | 2.5   | 77.8                               | 210.8                          |
| <i>C.braaudii</i> | K/2                             | 61.8                                    | 3.9                              | 9.4                              | 0.037                                | 0.8                               | 2.3   | 25.2                               | 68.2                           |
| <i>C.braaudii</i> | K/2                             | 88.6                                    | 4.6                              | 9.9                              | 0.041                                | 0.7                               | 3.7   | 32.8                               | 88.9                           |
| <i>C.braaudii</i> | K/2                             | 16.7                                    | 4.5                              | 9.3                              | 0.067                                | 1.0                               | 2.0   | 38.4                               | 104.0                          |
| <i>C.braaudii</i> | K/2                             | 22.4                                    | 4.2                              | 9.3                              | 0.089                                | 1.0                               | 3.1   | 38.8                               | 105.1                          |
| <i>C.braaudii</i> | K/2                             | 25.0                                    | 3.4                              | 7.3                              | 0.095                                | 0.9                               | 3.4   | 20.4                               | 55.4                           |
| <i>C.braaudii</i> | K/2                             | 21.3                                    | 5.2                              | 11.5                             | 0.077                                | 2.8                               | 2.6   | 123.7                              | 335.1                          |
| <i>C.braaudii</i> | K/2                             | 28.0                                    | 5.0                              | 10.7                             | 0.063                                | 2.1                               | 2.4   | 90.0                               | 243.8                          |
| <i>C.braaudii</i> | K/2                             | 40.3                                    | 3.9                              | 8.6                              | 0.050                                | 1.6                               | 2.3   | 48.2                               | 130.5                          |
| <i>C.braaudii</i> | K/2                             | 45.5                                    | 4.8                              | 10.6                             | 0.054                                | 1.4                               | 2.7   | 73.8                               | 199.9                          |
| <i>C.braaudii</i> | K/2                             | 87.1                                    | 5.0                              | 10.6                             | 0.052                                | 1.0                               | 4.3   | 45.3                               | 122.8                          |
| <i>C.braaudii</i> | K/2                             | 19.3                                    | 4.2                              | 9.9                              | 0.092                                | 1.1                               | 3.0   | 40.6                               | 110.1                          |
| <i>C.braaudii</i> | K/2                             | 21.8                                    | 3.9                              | 8.6                              | 0.064                                | 0.7                               | 2.1   | 22.2                               | 60.1                           |
| <i>C.braaudii</i> | K/2                             | 20.1                                    | 4.0                              | 8.4                              | 0.098                                | 1.0                               | 3.2   | 45.3                               | 122.8                          |
| <i>E.huxleyi</i>  | K/2                             | 11.2                                    | 1.1                              | 2.3                              | 0.33                                 | 0.3                               | 8.9   | 0.7                                | 1.8                            |
| <i>E.huxleyi</i>  | K/2                             | 20.5                                    | 1.4                              | 3.4                              | 0.097                                | 0.2                               | 3.2   | 1.1                                | 2.9                            |
| <i>E.huxleyi</i>  | K/2                             | 21.0                                    | 1.6                              | 3.7                              | 0.34                                 | 0.6                               | 11    | 2.8                                | 7.6                            |
| <i>E.huxleyi</i>  | K/2                             | 21.5                                    | 2.2                              | 4.7                              | 0.11                                 | 0.4                               | 3.9   | 4.8                                | 13.1                           |
| <i>E.huxleyi</i>  | K/2                             | 24.6                                    | 1.6                              | 3.6                              | 0.21                                 | 0.8                               | 7.6   | 3.1                                | 8.4                            |

## SUPPORTING INFORMATION

| Species           | Electrolyte | Distance from electrode / $\mu\text{m}$ | $r_{\text{eff}}$ / $\mu\text{m}$ | Coccolith length / $\mu\text{m}$ | Initial slope / $\mu\text{m s}^{-1}$ | Maximum thickness / $\mu\text{m}$ | $c_p$ | Coccolith volume / $\mu\text{m}^3$ | Coccolith mass / $\mu\text{g}$ |
|-------------------|-------------|-----------------------------------------|----------------------------------|----------------------------------|--------------------------------------|-----------------------------------|-------|------------------------------------|--------------------------------|
| <i>E.huxleyi</i>  | K/2         | 30.2                                    | 1.2                              | 2.5                              | 0.18                                 | 0.4                               | 7.0   | 1.1                                | 3.0                            |
| <i>E.huxleyi</i>  | K/2         | 35.3                                    | 1.5                              | 3.4                              | 0.13                                 | 0.4                               | 5.4   | 1.9                                | 5.2                            |
| <i>E.huxleyi</i>  | K/2         | 37.8                                    | 1.3                              | 2.8                              | 0.10                                 | 0.3                               | 4.6   | 1.1                                | 3.0                            |
| <i>E.huxleyi</i>  | K/2         | 9.3                                     | 1.8                              | 3.9                              | 0.34                                 | 0.4                               | 8.8   | 2.9                                | 7.9                            |
| <i>E.huxleyi</i>  | K/2         | 13.2                                    | 1.5                              | 3.5                              | 0.48                                 | 0.6                               | 13    | 2.6                                | 7.1                            |
| <i>E.huxleyi</i>  | K/2         | 16.1                                    | 1.9                              | 4.3                              | 0.21                                 | 0.4                               | 6.2   | 3.2                                | 8.7                            |
| <i>E.huxleyi</i>  | K/2         | 34.8                                    | 1.4                              | 3.7                              | 0.31                                 | 0.8                               | 13    | 3.1                                | 8.3                            |
| <i>E.huxleyi</i>  | K/2         | 40.0                                    | 1.6                              | 3.6                              | 0.13                                 | 0.4                               | 6.1   | 2.3                                | 6.2                            |
| <i>E.huxleyi</i>  | K/2         | 18.0                                    | 1.7                              | 4.1                              | 0.60                                 | 0.9                               | 19    | 4.8                                | 12.9                           |
| <i>E.huxleyi</i>  | K/2         | 39.5                                    | 1.8                              | 4.2                              | 0.19                                 | 0.3                               | 8.8   | 1.5                                | 4.2                            |
| <i>E.huxleyi</i>  | K/2         | 43.5                                    | 2.1                              | 5.0                              | 0.22                                 | 0.8                               | 11    | 7.6                                | 20.5                           |
| <i>E.huxleyi</i>  | K/2         | 23.9                                    | 2.2                              | 4.8                              | 0.23                                 | 0.6                               | 8.2   | 6.4                                | 17.3                           |
| <i>E.huxleyi</i>  | K/2         | 27.9                                    | 2.2                              | 5.2                              | 0.22                                 | 0.6                               | 8.1   | 6.7                                | 18.2                           |
| <i>E.huxleyi</i>  | K/2         | 11.5                                    | 1.5                              | 3.7                              | 0.34                                 | 0.7                               | 9.2   | 3.1                                | 8.3                            |
| <i>E.huxleyi</i>  | K/2         | 29.2                                    | 1.7                              | 4.1                              | 0.28                                 | 0.7                               | 11    | 3.9                                | 10.5                           |
| <i>E.huxleyi</i>  | K/2         | 15.1                                    | 1.8                              | 4.2                              | 0.26                                 | 0.5                               | 7.7   | 3.5                                | 9.6                            |
| <i>E.huxleyi</i>  | K/2         | 18.3                                    | 2.3                              | 4.8                              | 0.35                                 | 1.1                               | 11    | 10.8                               | 29.2                           |
| <i>E.huxleyi</i>  | K/2         | 24.7                                    | 2.2                              | 4.5                              | 0.25                                 | 0.9                               | 9.1   | 8.6                                | 23.3                           |
| <i>E.huxleyi</i>  | K/2         | 34.0                                    | 2.0                              | 4.6                              | 0.15                                 | 0.5                               | 6.3   | 4.8                                | 13.0                           |
| <i>E.huxleyi</i>  | K/2         | 46.5                                    | 2.1                              | 4.9                              | 0.077                                | 0.4                               | 3.9   | 4.5                                | 12.2                           |
| <i>E.huxleyi</i>  | K/2         | 9.7                                     | 1.9                              | 4.3                              | 0.64                                 | 0.9                               | 16    | 6.7                                | 18.1                           |
| <i>E.huxleyi</i>  | K/2         | 10.4                                    | 1.6                              | 4.0                              | 0.12                                 | 0.3                               | 3.2   | 1.6                                | 4.3                            |
| <i>E.huxleyi</i>  | K/2         | 16.2                                    | 1.6                              | 3.8                              | 0.23                                 | 0.5                               | 7.0   | 2.6                                | 7.1                            |
| <i>E.huxleyi</i>  | K/2         | 23.7                                    | 1.7                              | 4.4                              | 0.29                                 | 0.6                               | 10    | 3.6                                | 9.8                            |
| <i>E.huxleyi</i>  | K/2         | 30.1                                    | 2.1                              | 4.8                              | 0.14                                 | 0.4                               | 5.4   | 4.2                                | 11.3                           |
| <i>E.huxleyi</i>  | K/2         | 38.8                                    | 1.5                              | 3.3                              | 0.11                                 | 0.3                               | 4.8   | 1.5                                | 4.2                            |
| <i>C.leptopus</i> | K/2         | 14.5                                    | 3.5                              | 6.4                              | 0.024                                | 0.3                               | 0.69  | 8.8                                | 23.8                           |
| <i>C.leptopus</i> | K/2         | 80.8                                    | 2.6                              | 5.8                              | 0.020                                | 0.3                               | 1.5   | 6.5                                | 17.5                           |
| <i>C.leptopus</i> | K/2         | 81.2                                    | 2.7                              | 5.8                              | 0.023                                | 0.5                               | 1.8   | 6.2                                | 16.8                           |
| <i>C.leptopus</i> | K/2         | 76.6                                    | 2.9                              | 6.4                              | 0.012                                | 0.2                               | 0.88  | 4.4                                | 11.9                           |
| <i>C.leptopus</i> | K/2         | 24.0                                    | 1.8                              | 4.2                              | 0.095                                | 0.5                               | 3.4   | 3.3                                | 8.9                            |
| <i>C.leptopus</i> | K/2         | 94.8                                    | 2.9                              | 6.4                              | 0.010                                | 0.2                               | 0.93  | 4.8                                | 12.9                           |
| <i>C.leptopus</i> | K/2         | 29.7                                    | 2.2                              | 4.5                              | 0.056                                | 0.5                               | 2.1   | 4.8                                | 13.0                           |
| <i>C.leptopus</i> | K/2         | 54.0                                    | 2.0                              | 4.6                              | 0.027                                | 0.4                               | 1.5   | 7.8                                | 21.1                           |
| <i>C.leptopus</i> | K/2         | 44.2                                    | 3.3                              | 7.2                              | 0.034                                | 0.6                               | 1.6   | 14.5                               | 39.2                           |
| <i>C.leptopus</i> | K/2         | 55.4                                    | 1.9                              | 4.1                              | 0.13                                 | 0.9                               | 7.4   | 6.1                                | 16.4                           |
| <i>C.leptopus</i> | K/2         | 46.5                                    | 3.1                              | 6.4                              | 0.019                                | 0.4                               | 0.96  | 7.8                                | 21.1                           |
| <i>C.leptopus</i> | K/2         | 53.8                                    | 3.2                              | 6.5                              | 0.027                                | 0.6                               | 1.5   | 11.8                               | 31.9                           |
| <i>C.leptopus</i> | K/2         | 69.7                                    | 3.4                              | 7.0                              | 0.009                                | 0.3                               | 0.60  | 6.7                                | 18.2                           |
| <i>C.leptopus</i> | K/2         | 30.2                                    | 2.1                              | 5.0                              | 0.074                                | 0.5                               | 2.9   | 4.4                                | 12.0                           |
| <i>C.leptopus</i> | K/2         | 38.1                                    | 3.1                              | 6.2                              | 0.045                                | 0.5                               | 2.0   | 11.0                               | 29.7                           |
| <i>C.leptopus</i> | K/2         | 40.7                                    | 3.2                              | 6.2                              | 0.088                                | 1.0                               | 4.1   | 19.6                               | 53.2                           |
| <i>C.leptopus</i> | K/2         | 19.3                                    | 3.4                              | 7.2                              | 0.029                                | 0.3                               | 0.93  | 8.7                                | 23.6                           |
| <i>C.leptopus</i> | K/2         | 31.5                                    | 3.7                              | 7.2                              | 0.043                                | 0.6                               | 1.7   | 18.5                               | 50.1                           |
| <i>C.leptopus</i> | K/2         | 53.7                                    | 2.4                              | 4.8                              | 0.029                                | 0.3                               | 1.6   | 4.0                                | 11.0                           |
| <i>C.leptopus</i> | K/2         | 56.2                                    | 3.2                              | 6.8                              | 0.028                                | 0.4                               | 1.6   | 9.1                                | 24.6                           |
| <i>C.leptopus</i> | K/2         | 59.3                                    | 3.2                              | 6.6                              | 0.032                                | 0.5                               | 1.9   | 11.8                               | 32.0                           |



## SUPPORTING INFORMATION

| Species           | Electrolyte | Distance from electrode / $\mu\text{m}$ | $r_{\text{eff}}$ / $\mu\text{m}$ | Coccolith length / $\mu\text{m}$ | Initial slope / $\mu\text{m s}^{-1}$ | Maximum thickness / $\mu\text{m}$ | $c_p$ | Coccolith volume / $\mu\text{m}^3$ | Coccolith mass / $\mu\text{g}$ |
|-------------------|-------------|-----------------------------------------|----------------------------------|----------------------------------|--------------------------------------|-----------------------------------|-------|------------------------------------|--------------------------------|
| <i>G.oceanica</i> | K/2         | 16.6                                    | 2.2                              | 4.7                              | 0.14                                 | 0.5                               | 4.2   | 5.5                                | 14.9                           |
| <i>G.oceanica</i> | K/2         | 33.4                                    | 1.9                              | 4.7                              | 0.10                                 | 0.7                               | 4.3   | 3.3                                | 9.0                            |
| <i>G.oceanica</i> | K/2         | 37.0                                    | 2.4                              | 5.7                              | 0.19                                 | 0.9                               | 8.1   | 8.4                                | 22.7                           |
| <i>G.oceanica</i> | K/2         | 8.6                                     | 2.6                              | 5.7                              | 0.12                                 | 0.9                               | 2.9   | 13.7                               | 37.2                           |
| <i>G.oceanica</i> | K/2         | 14.1                                    | 2.0                              | 5.1                              | 0.22                                 | 1.2                               | 6.2   | 10.6                               | 28.6                           |
| <i>G.oceanica</i> | K/2         | 16.9                                    | 2.4                              | 4.9                              | 0.25                                 | 1.3                               | 7.5   | 14.8                               | 40.0                           |
| <i>G.oceanica</i> | K/2         | 15.3                                    | 1.8                              | 4.3                              | 0.21                                 | 0.9                               | 6.3   | 8.4                                | 22.8                           |
| <i>G.oceanica</i> | K/2         | 36.1                                    | 1.8                              | 3.9                              | 0.16                                 | 1.1                               | 7.1   | 7.8                                | 21.1                           |
| <i>G.oceanica</i> | K/2         | 44.1                                    | 1.5                              | 3.7                              | 0.093                                | 0.7                               | 4.5   | 4.5                                | 12.1                           |
| <i>G.oceanica</i> | K/2         | 54.0                                    | 3.2                              | 7.6                              | 0.044                                | 0.6                               | 2.4   | 15.2                               | 41.2                           |
| <i>G.oceanica</i> | K/2         | 22.0                                    | 2.7                              | 6.1                              | 0.060                                | 0.5                               | 2.0   | 8.6                                | 23.3                           |
| <i>G.oceanica</i> | K/2         | 29.3                                    | 3.1                              | 6.3                              | 0.087                                | 0.9                               | 3.4   | 19.4                               | 52.6                           |
| <i>G.oceanica</i> | K/2         | 52.9                                    | 2.5                              | 5.6                              | 0.082                                | 0.8                               | 4.5   | 15.8                               | 42.7                           |
| <i>G.oceanica</i> | K/2         | 11.7                                    | 2.1                              | 4.8                              | 0.14                                 | 0.9                               | 3.7   | 8.8                                | 23.8                           |
| <i>G.oceanica</i> | K/2         | 16.4                                    | 2.1                              | 5.0                              | 0.18                                 | 1.1                               | 5.4   | 11.5                               | 31.0                           |
| <i>G.oceanica</i> | K/2         | 18.2                                    | 2.0                              | 4.1                              | 0.14                                 | 1.2                               | 4.4   | 11.0                               | 29.9                           |
| <i>G.oceanica</i> | K/2         | 20.5                                    | 1.9                              | 4.5                              | 0.067                                | 0.5                               | 2.2   | 4.4                                | 11.8                           |
| <i>G.oceanica</i> | K/2         | 47.4                                    | 2.6                              | 5.7                              | 0.11                                 | 1.0                               | 5.8   | 16.2                               | 44.0                           |
| <i>G.oceanica</i> | K/2         | 11.8                                    | 3.5                              | 7.3                              | 0.12                                 | 0.9                               | 3.3   | 23.7                               | 64.3                           |
| <i>G.oceanica</i> | K/2         | 25.6                                    | 3.4                              | 7.7                              | 0.10                                 | 1.0                               | 3.7   | 24.0                               | 65.1                           |
| <i>G.oceanica</i> | K/2         | 13.7                                    | 3.0                              | 6.6                              | 0.20                                 | 1.5                               | 5.6   | 27.5                               | 74.5                           |
| <i>G.oceanica</i> | K/2         | 34.1                                    | 2.9                              | 6.4                              | 0.087                                | 0.9                               | 3.6   | 16.7                               | 45.3                           |
| <i>G.oceanica</i> | K/2         | 38.7                                    | 2.7                              | 5.9                              | 0.13                                 | 1.1                               | 5.9   | 13.9                               | 37.8                           |
| <i>G.oceanica</i> | K/2         | 24.5                                    | 2.4                              | 5.3                              | 0.27                                 | 1.7                               | 9.6   | 22.2                               | 60.2                           |
| <i>G.oceanica</i> | K/2         | 33.8                                    | 2.2                              | 5.2                              | 0.23                                 | 1.4                               | 9.5   | 14.7                               | 39.8                           |
| <i>G.oceanica</i> | K/2         | 49.8                                    | 2.7                              | 6.0                              | 0.11                                 | 0.9                               | 5.6   | 14.9                               | 40.4                           |
| <i>G.oceanica</i> | K/2         | 50.7                                    | 3.4                              | 7.4                              | 0.097                                | 1.0                               | 5.1   | 23.1                               | 62.6                           |

## References

1. M. D. Keller, R. C. Selvin, W. Claus and R. R. Guillard, *Journal of Phycology*, 1987, **23**, 633-638.
2. F. M. Morel, J. Rueter, D. M. Anderson and R. Guillard, *Journal of Phycology*, 1979, **15**, 135-141.
3. C. Batchelor-McAuley, J. Ellison, K. Tschulik, P. L. Hurst, R. Boldt and R. G. Compton, *Analyst*, 2015, **140**, 5048-5054.
4. J. Schindelin, I. Arganda-Carreras, E. Frise, V. Kaynig, M. Longair, T. Pietzsch, S. Preibisch, C. Rueden, S. Saalfeld and B. Schmid, *Nature Methods*, 2012, **9**, 676-682.
5. J. W. Anthony, *Handbook of Mineralogy: Borates, carbonates, sulfates*, Mineral Data Pub., 1990.
6. M. Quan, D. Sanchez, M. F. Wasylikiw and D. K. Smith, *Journal of the American Chemical Society*, 2007, **129**, 12847-12856.
7. M. Yang, C. Batchelor-McAuley, E. Kätelhön and R. G. Compton, *Analytical Chemistry*, 2017, **89**, 6870-6877.
8. J. Ma, M. Yang, C. Batchelor-McAuley and R. G. Compton, *Physical Chemistry Chemical Physics*, 2020, **22**, 12422-12433.
9. E. Kätelhön and R. G. Compton, *Analyst*, 2015, **140**, 2592-2598.
10. R. G. Compton and C. A. Brown, *Journal of Colloid and Interface Science*, 1994, **165**, 445-449.

SUPPORTING INFORMATION

---

11. R. G. Compton, E. Katelhon, K. R. Ward and E. Laborda, *Understanding Voltammetry: Simulation of Electrode Processes*, World Scientific, 2020.

### Author Contributions

Conceptualization: MY, CBM, RGC, REMR, HAB

Methodology: MY, CBM

Experiment: MY (lead), SB, CBM

Formal analysis: MY

Visualization: MY

Supervision: RGC

Writing—original draft: MY (equal), CBM (equal), RGC

Writing—review & editing: MY, CBM, RGC, REMR, HAB
